# Supplementary material for: Introduction of multiple disulfide bonds increases the thermostability of transglutaminase
Source: Research Square preprint supplement (doi:10.21203/rs.3.rs-5776787/v1), 2025-02-10
Supplement: Supplementary file 1 [file 4e9231483ed581e62f06cb2b.xlsx]

## Sheet: Fig2a
Themostability
average	temperature	WT	A81C/V311C	E93C/V112C	A106C/D213C	E107C/Y217C	A160C/G228C	D3C/G283C	D3C/G283C/A81C/V311C	D3C/G283C/E93C/V112C	D3C/G283C/A106C/D213C	D3C/G283C/E107C/Y217C	D3C/G283C/A160C/G228C
	4	1	1	1	1	1	1	1	1	1	1	1	1
	50	0.841139	0.927437	0.878141	0.916667	0.883305	0.857966	0.975715	0.91246	1.05495	0.952163	0.964953	0.947697
	60	0.131823	0.266315	0.156971	0.177957	0.141157	0.130422	0.905865	0.883041	0.995676	0.912947	0.902055	0.920694
	65	0.0223957	0.0123694	0.0130809	0.0255164	0.0110889	0.00627803	0.428294	0.702803	0.783383	0.729727	0.719725	0.695087
	70	0.0215794	-0.0026125	0.00909761	0.00896112	-0.00471159	-0.00198253	0.0712054	0.313769	0.13953	0.205636	0.0773965	0.226174
	75	0.0349964	0.0163681	0.0202115	0.0208586	0.0058538	0.00514515	0.0961981	0.0299919	0.126384	0.0918317	0.117816	0.0534944
stdevp	temperature	WT	A81C/V311C	E93C/V112C	A106C/D213C	E107C/Y217C	A160C/G228C	D3C/G283C	D3C/G283C/A81C/V311C	D3C/G283C/E93C/V112C	D3C/G283C/A106C/D213C	D3C/G283C/E107C/Y217C	D3C/G283C/A160C/G228C
	4	0.0154528	0.0229659	0.0413883	0.0106043	0.025883	0.00574213	0.0608359	0.0733537	0.0107338	0.0224429	0.000958839	0.0172304
	50	0.0287842	0.0302495	0.00460317	0.00809633	0.0129846	0.0103108	0.00817317	0.00735997	0.00643022	0.0187652	0.0264497	0.00403048
	60	0.0108719	0.0261968	0.0231619	0.0201215	0.00522167	0.0228365	0.0506399	0.0631332	0.0161301	0.0200704	0.00196393	0.0295692
	65	0.00301033	0.00852627	0.00309537	0.0171168	0.00947807	0.00137943	0.0331378	0.00331151	0.00573852	0.014686	0.00437161	0.0160853
	70	0.00231431	0.00579997	0.00164428	0.00399158	0.00221494	0.00232113	0.00300214	0.00841052	0.0136097	0.0343151	0.0109168	0.0307061
	75	0.00362244	0.00399196	0.00114908	0.0041675	0.00236623	0.00135004	0.000433155	0.00821323	0.00401782	0.00565035	0.00287935	0.00515507

## Sheet: Fig2b
U/mg
Average
	37	45	55	60	65	70	75	80
WT	25.825	37.0854	48.1977	36.6412	14.0269	6.07691	4.01783	1.12593
A81C/V311C	28.7	41.4709	54.8173	43.2183	17.4624	7.19049	4.22693	2.09557
E93C/V112C	20.1965	30.0328	37.9089	28.2105	10.1559	5.20296	3.40912	2.21837
A106C/D213C	23.0912	35.9519	45.4534	33.8532	13.3393	6.13956	4.49799	3.64252
E107C/Y217C	20.0583	29.4156	36.9335	26.2493	10.325	5.19513	2.37291	2.56922
A160C/G228C	19.4887	28.6885	38.2996	28.1711	10.9797	5.98294	4.78453	3.41766
D3C/G283C	22.3352	34.5623	50.0864	55.7948	44.7998	9.72462	4.05692	1.61915
D3C/G283C/A81C/V311C	29.3034	44.0236	64.3046	74.7416	66.4963	39.3298	13.4779	5.57461
D3C/G283C/E93C/V112C	26.2574	40.2219	54.4828	63.3507	53.5378	25.9951	8.91907	5.08812
D3C/G283C/A106C/D213C	27.2045	41.2499	58.5696	69.0212	60.1722	28.0348	9.227	5.77571
D3C/G283C/E107C/Y217C	27.9652	42.1409	56.666	62.9558	53.8013	29.0007	9.41791	5.16797
D3C/G283C/A160C/G228C	27.2078	42.626	59.1724	66.8954	60.3245	28.05	10.0461	5.89252
stdevp
	37	45	55	60	65	70	75	80
WT	0.138998	0.277094	1.66972	0.554251	0.712375	0.0561658	1.40541	0.231812
A81C/V311C	0.648498	1.34877	0.876799	0.259703	0.43229	0.0231249	1.03834	0.245951
E93C/V112C	0.183097	1.02943	0.866565	0.21682	0.0876603	0.0364629	0.510858	0.11728
A106C/D213C	0.692685	1.17127	0.834623	0.716483	0.626033	0.0326284	0.56934	1.01384
E107C/Y217C	0.16311	0.631943	1.17459	0.537107	0.987023	0.246379	0.0548929	0.28015
A160C/G228C	0.487619	0.56419	0.573278	0.593299	0.217298	0.112266	0.472507	0.0626657
D3C/G283C	0.343981	1.61604	0.93632	0.504236	0.628014	0.0446939	0.194737	0.143378
D3C/G283C/A81C/V311C	0.610652	0.15366	1.15496	0.841083	1.66273	0.380188	0.426958	0.315682
D3C/G283C/E93C/V112C	0.299676	0.245665	1.58367	1.13679	0.629863	3.54209	0.193148	0.134014
D3C/G283C/A106C/D213C	0.627071	0.221047	1.65188	2.81228	1.77395	0.28631	0.0716879	0.74512
D3C/G283C/E107C/Y217C	0.293701	0.190094	0.851336	0.904796	0.0702978	0.597168	0.745012	0.282516
D3C/G283C/A160C/G228C	0.154719	1.05019	2.35006	0.334752	0.487235	0.277755	0.853191	0.254581

## Sheet: Fig2c
Max activity = 100%
Average
	37	45	55	60	65	70	75	80
WT	0.535814	0.769443	1	0.760228	0.291029	0.126083	0.0833615	0.0233606
A81C/V311C	0.523558	0.75653	1	0.788407	0.318556	0.131172	0.0771095	0.0382282
E93C/V112C	0.532764	0.792236	1	0.744166	0.267904	0.137249	0.0899293	0.0585184
A106C/D213C	0.50802	0.790963	1	0.74479	0.293471	0.135074	0.0989583	0.0801376
E107C/Y217C	0.543091	0.796448	1	0.710718	0.279556	0.140662	0.064248	0.0695634
A160C/G228C	0.50885	0.749056	1	0.735546	0.286679	0.156214	0.124924	0.0892348
D3C/G283C	0.40031	0.619454	0.897689	1	0.802939	0.174293	0.0727115	0.0290197
D3C/G283C/A81C/V311C	0.392063	0.589011	0.860359	1	0.889682	0.526211	0.180327	0.074585
D3C/G283C/E93C/V112C	0.414477	0.634908	0.860019	1	0.845102	0.410336	0.140789	0.0803167
D3C/G283C/A106C/D213C	0.394148	0.59764	0.848574	1	0.871794	0.406177	0.133684	0.0836802
D3C/G283C/E107C/Y217C	0.444204	0.669372	0.900091	1	0.854589	0.460652	0.149596	0.0820888
D3C/G283C/A160C/G228C	0.406722	0.637204	0.884552	1	0.901774	0.419311	0.150176	0.0880857
stdevp
	37	45	55	60	65	70	75	80
WT	0.00288391	0.00574912	0.0346432	0.0114995	0.0147803	0.00116532	0.0291592	0.0048096
A81C/V311C	0.0118302	0.0246048	0.0159949	0.00473762	0.00788602	0.000421854	0.0189418	0.00448674
E93C/V112C	0.00482993	0.0271554	0.0228592	0.00571952	0.0023124	0.000961856	0.013476	0.00309374
A106C/D213C	0.0152395	0.0257686	0.0183622	0.015763	0.0137731	0.000717843	0.0125258	0.0223051
E107C/Y217C	0.0044163	0.0171103	0.0318027	0.0145425	0.0267243	0.00667087	0.00148626	0.00758524
A160C/G228C	0.0127317	0.014731	0.0149682	0.015491	0.00567364	0.00293126	0.0123371	0.0016362
D3C/G283C	0.00616511	0.028964	0.0167815	0.00903733	0.0112558	0.000801041	0.00349024	0.00256974
D3C/G283C/A81C/V311C	0.00817017	0.00205588	0.0154527	0.0112532	0.0222464	0.0050867	0.00571245	0.00422365
D3C/G283C/E93C/V112C	0.00473042	0.00387786	0.0249984	0.0179444	0.00994247	0.0559124	0.00304887	0.00211543
D3C/G283C/A106C/D213C	0.00908519	0.00320259	0.0239329	0.0407451	0.0257015	0.00414814	0.00103864	0.0107955
D3C/G283C/E107C/Y217C	0.0046652	0.00301948	0.0135227	0.0143719	0.00111662	0.00948551	0.0118339	0.00448753
D3C/G283C/A160C/G228C	0.00231285	0.015699	0.0351303	0.00500412	0.00728355	0.00415208	0.0127541	0.00380567

## Sheet: Fig3
Protein reactivity		NH3 (mM)
Average	substrate	WT	A81C/V311C	E93C/V112C	A106C/D213C	E107C/Y217C	A160C/G228C	D3C/G283C	D3C/G283C/A81C/V311C	D3C/G283C/E93C/V112C	D3C/G283C/A106C/D213C	D3C/G283C/E107C/Y217C	D3C/G283C/A160C/G228C
	sodium caseinate	1.08001	0.880723	1.0993	0.994296	1.2793	0.994296	1.44937	1.05101	1.29917	1.25781	1.31006	1.22951
	fish gelatin	0.549648	0.637292	0.592935	0.553077	0.524791	0.552863	0.501149	0.551216	0.471979	0.512686	0.397531	0.396225
	soy protein isolate	0.429433	0.347789	0.420218	0.393861	0.422576	0.421598	0.428782	0.344103	0.410061	0.390469	0.375667	0.297954
	α-lactalbumin	0.0930009	0.0835723	0.0983581	0.0792865	0.0942867	0.0891437	0.133202	0.120358	0.124059	0.156929	0.141474	0.126889
stdevp	substrate	WT	A81C/V311C	E93C/V112C	A106C/D213C	E107C/Y217C	A160C/G228C	D3C/G283C	D3C/G283C/A81C/V311C	D3C/G283C/E93C/V112C	D3C/G283C/A106C/D213C	D3C/G283C/E107C/Y217C	D3C/G283C/A160C/G228C
	sodium caseinate	0.0218532	0.0212134	0.0160358	0.0307561	0.0974008	0.028909	0.0244349	0.0192253	0.0232423	0.0110997	0.0414172	0.105211
	fish gelatin	0.0355279	0.00776775	0.015113	0.0371306	0.0124102	0.0267714	0.0185018	0.00957314	0.0173629	0.0211299	0.0257732	0.0221289
	soy protein isolate	0.0149603	0.0197052	0.0152972	0.0343449	0.0349085	0.0433754	0.0125088	0.00473931	0.0192253	0.0342089	0.0177996	0.0213375
	α-lactalbumin	0.0133926	0.0131992	0.00504374	0.0255551	0.00481075	0.0086727	0.0168139	0.0149332	0.00187259	0.00636143	0.00423226	0.0198463
