# Supplementary material for: Introduction of multiple disulfide bonds increases the thermostability of transglutaminase
Source: Research Square preprint supplement (doi:10.21203/rs.3.rs-5776787/v1), 2025-02-10
Supplement: Supplementary file 2 [file 886076df751193b10baa66c4.docx]

# Supplementary Information:

# Title

Introduction of multiple disulfide bonds increases the thermostability of transglutaminase

Takuto Ono†, Kazutoshi Takahashi†*, Yoshinori Hirao, Yasuhiro Mihara, Isao Abe, Masayuki Sugiki

Research Institute for Bioscience Products & Fine Chemicals, Ajinomoto Co., Inc., 1-1 Suzuki-cho, Kawasaki-ku, Kawasaki-shi, Kanagawa-ken 210-8681, Japan

†These authors contributed equally to this work

**Correspondence:**

Name: Kazutoshi Takahashi

Address: Research Institute for Bioscience Products & Fine Chemicals, Ajinomoto Co., Inc., 1-1 Suzuki-cho, Kawasaki-ku, Kawasaki-shi, Kanagawa-ken 210-8681, Japan

Email: [*kazutoshi.takahashi.pu7@asv.ajinomoto.com](mailto:*kazutoshi.takahashi.pu7@asv.ajinomoto.com)


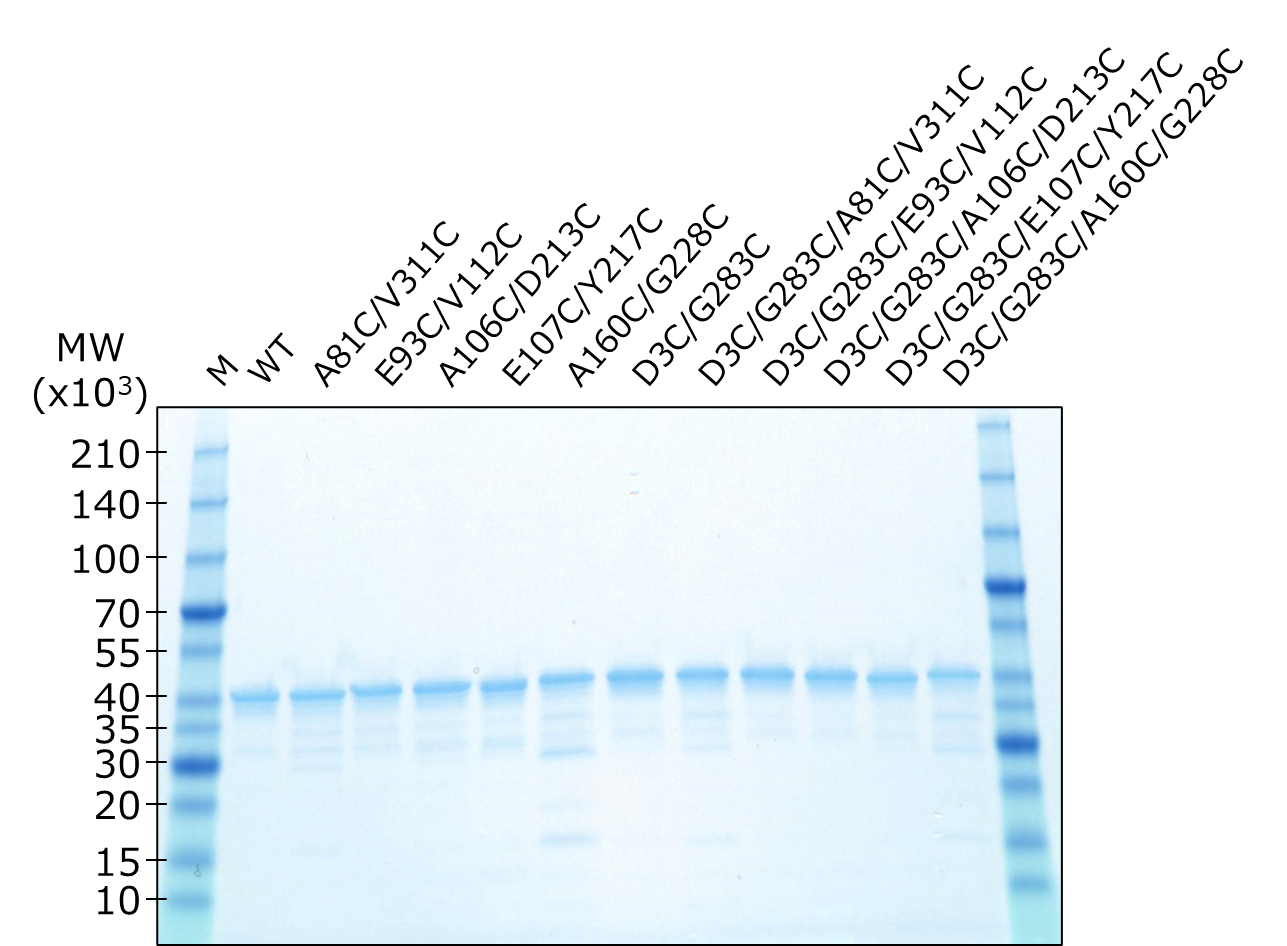


**Supplementary Figure S1: Purity verification of the prepared enzyme by SDS-PAGE.**

Lane M represent the protein marker.


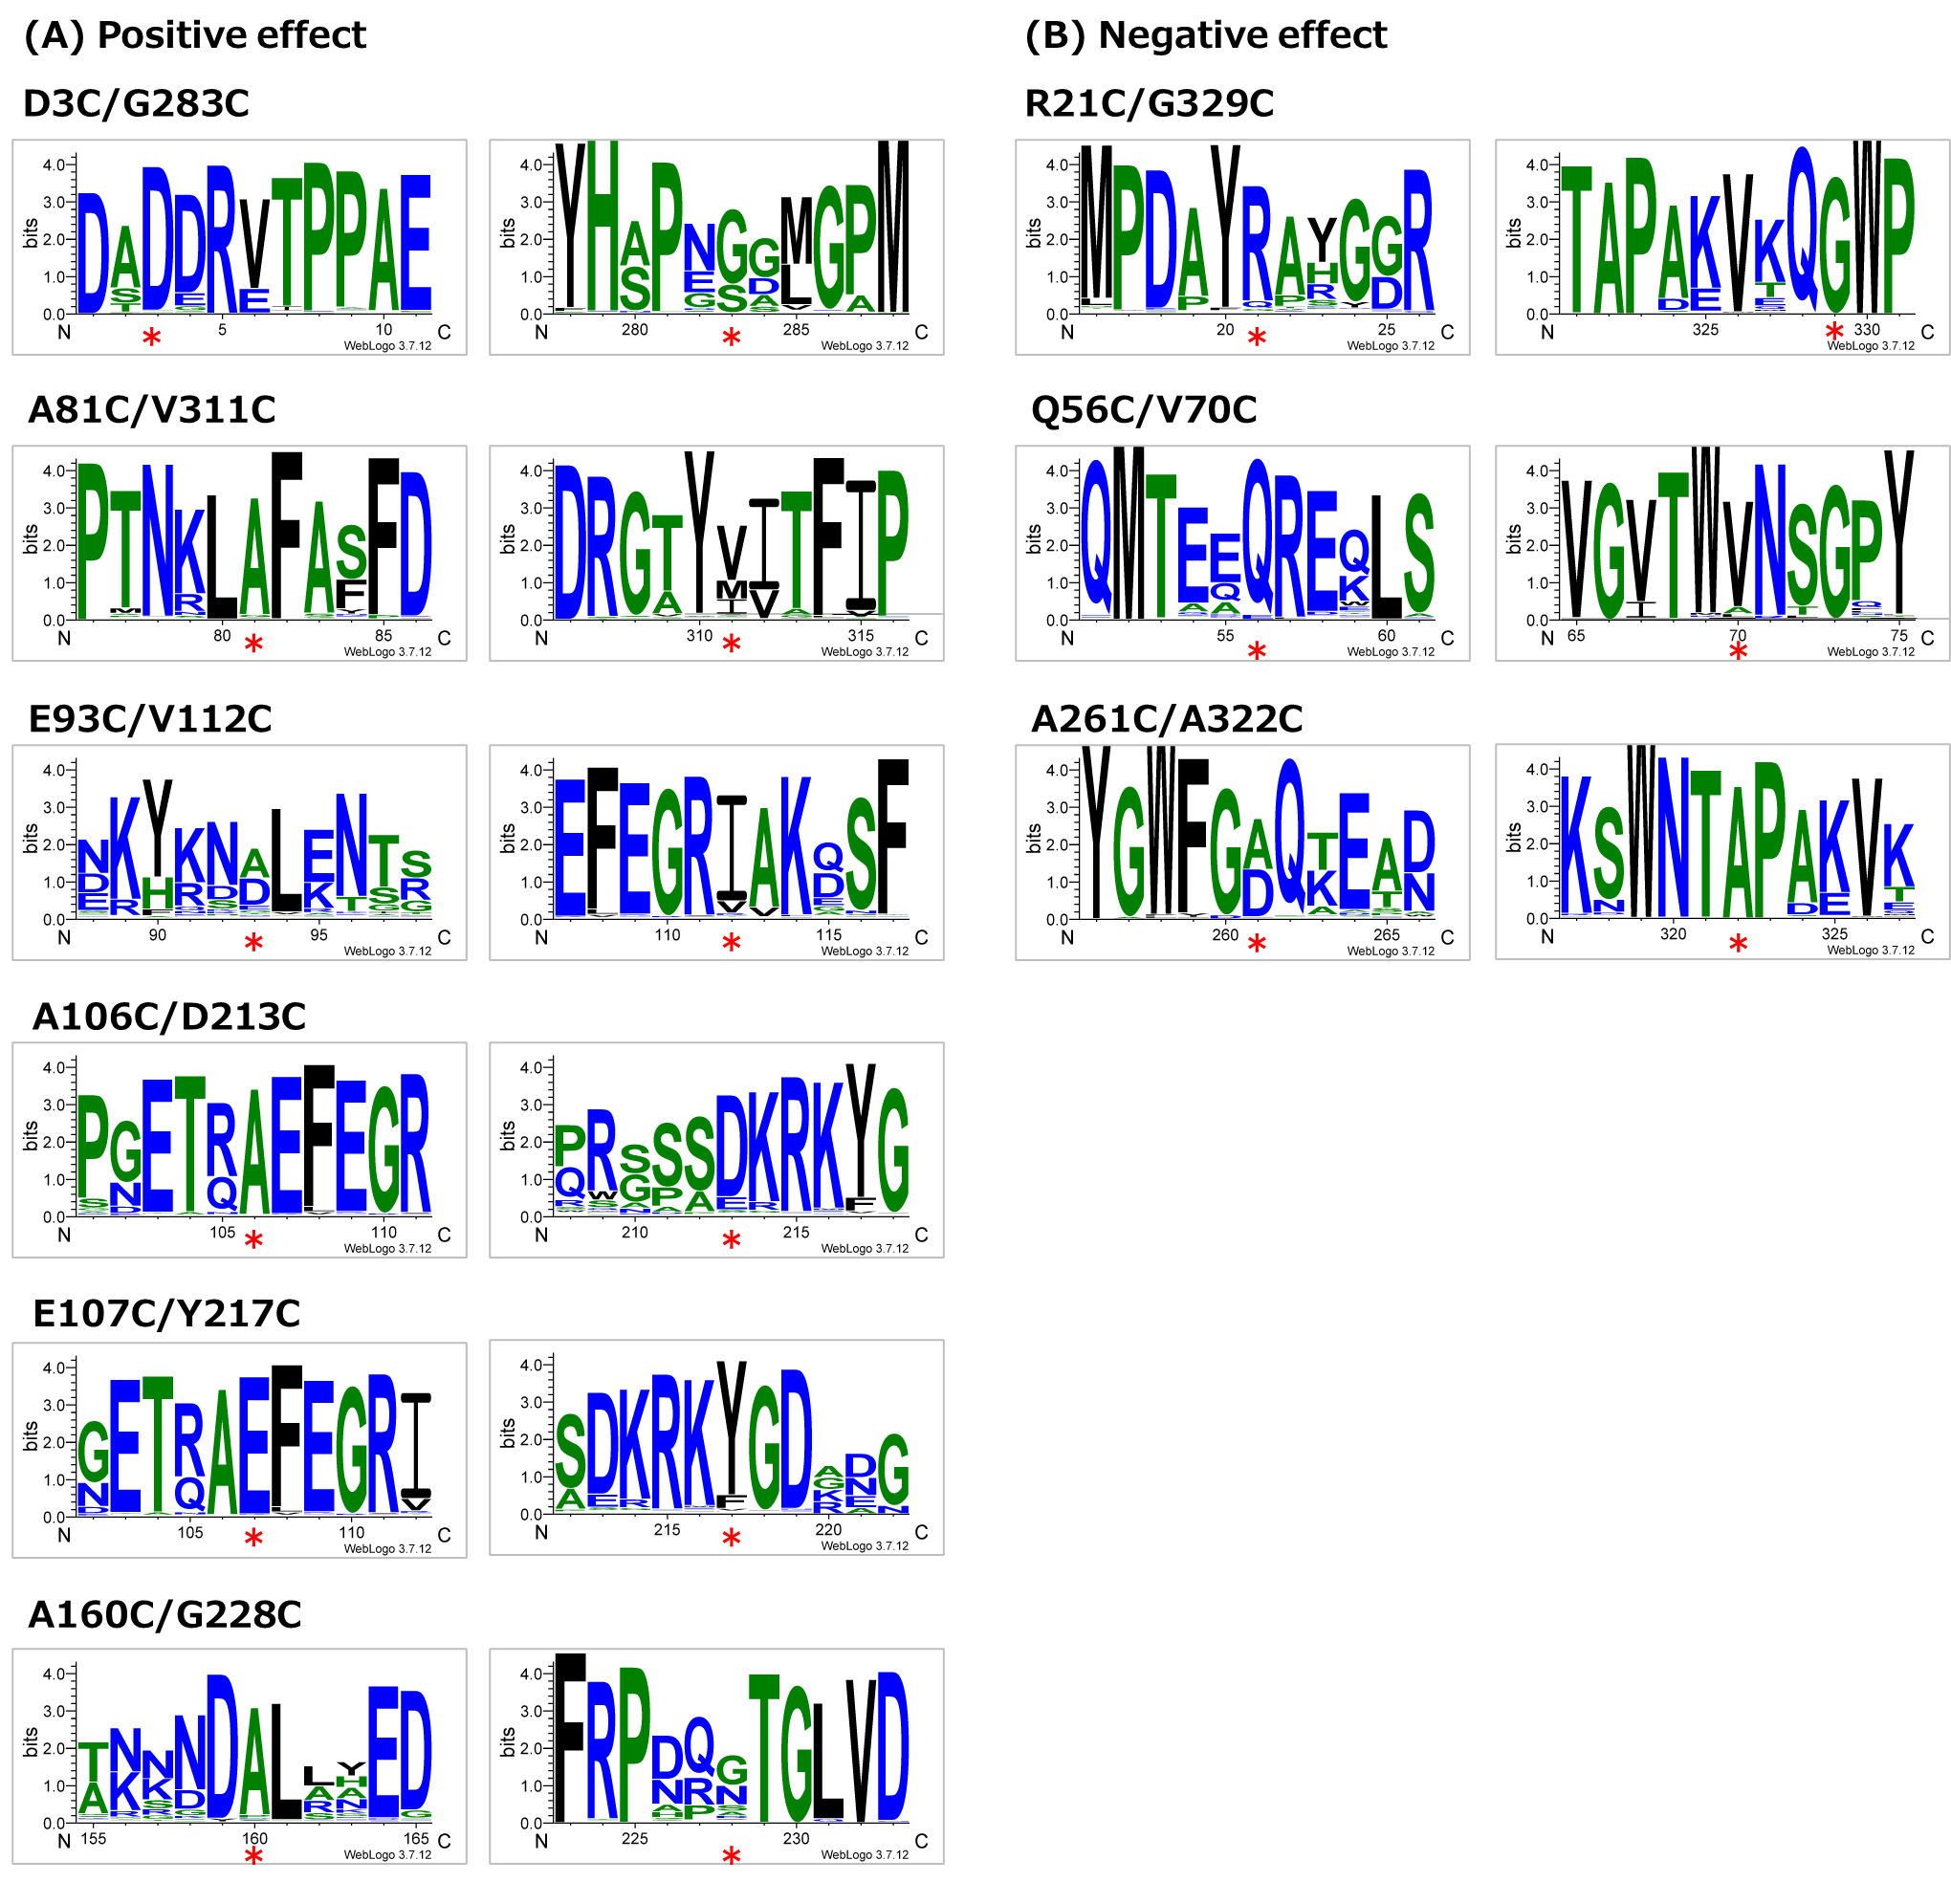


**Supplementary Figure S2: Sequence logos of** Microbial Transglutaminase

Amino acid frequencies of 11 residues around the mutation points are represented as sequence logos. The logos were prepared using the WebLogo3 software[34].
